# Supplementary material for: Sensitivity improvement by Langmuir film formation on a spectroelectrochemical fiber-optic sensor surface
Source: Royal Society of Chemistry journal article supplement (doi:10.1039/d4ay01874e), 2025-01-01
Supplement: d4ay01874e1.pdf [file d4ay01874e1.pdf]

## Supporting Information

### **Sensitivity improvement by Langmuir film formation on a spectroelectrochemical fiber-optic sensor surface**

Takamichi Yamamoto,<sup>a</sup> Tatsuya Orii,<sup>a</sup> Takuya Okazaki,<sup>b</sup> Sarkawi Muhammad,<sup>a</sup> Kazuto Sazawa,<sup>a</sup>  
Kazuharu Sugawara,<sup>c</sup> and Hideki Kuramitz\*<sup>a</sup>

<sup>a</sup>Department of Environmental Biology and Chemistry, Faculty of Science, Academic Assembly,  
University of Toyama, Gofuku 3190, Toyama 930-8555, Japan

<sup>b</sup>Department of Applied Chemistry, School of Science and Technology, Meiji University, 1-1-1Tama-ku,  
HigashimitaKawasaki, Kanagawa 214-8571, Japan

<sup>c</sup>Maebashi Institute of Technology, Maebashi, Gunma 371-0816, Japan

Corresponding author: kuramitz@sci.u-toyama.ac.jp

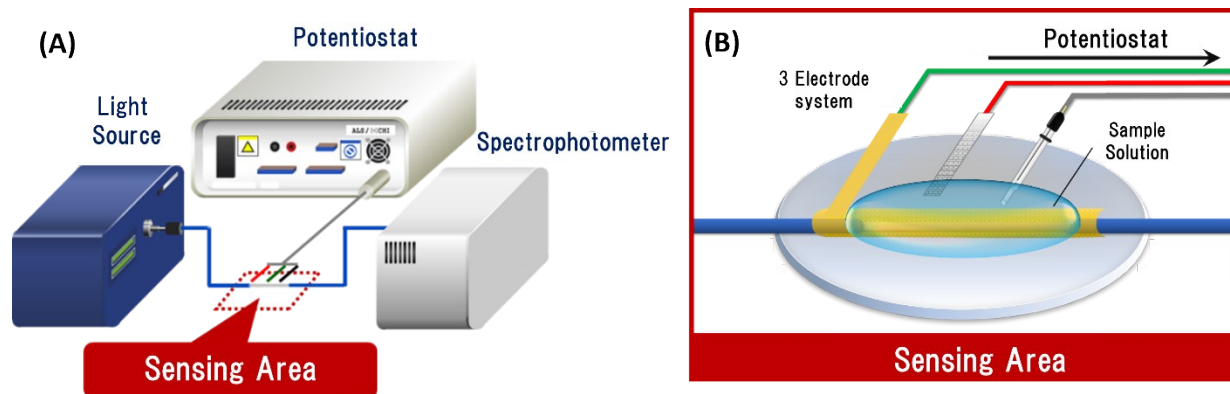

**Figure S1.** Schematic representation of the spectroelectrochemical experimental setup. (A) Instrument configuration showing the light source, spectrophotometer, and potentiostat connected to the sensing area. (B) Detailed view of the sensing area.

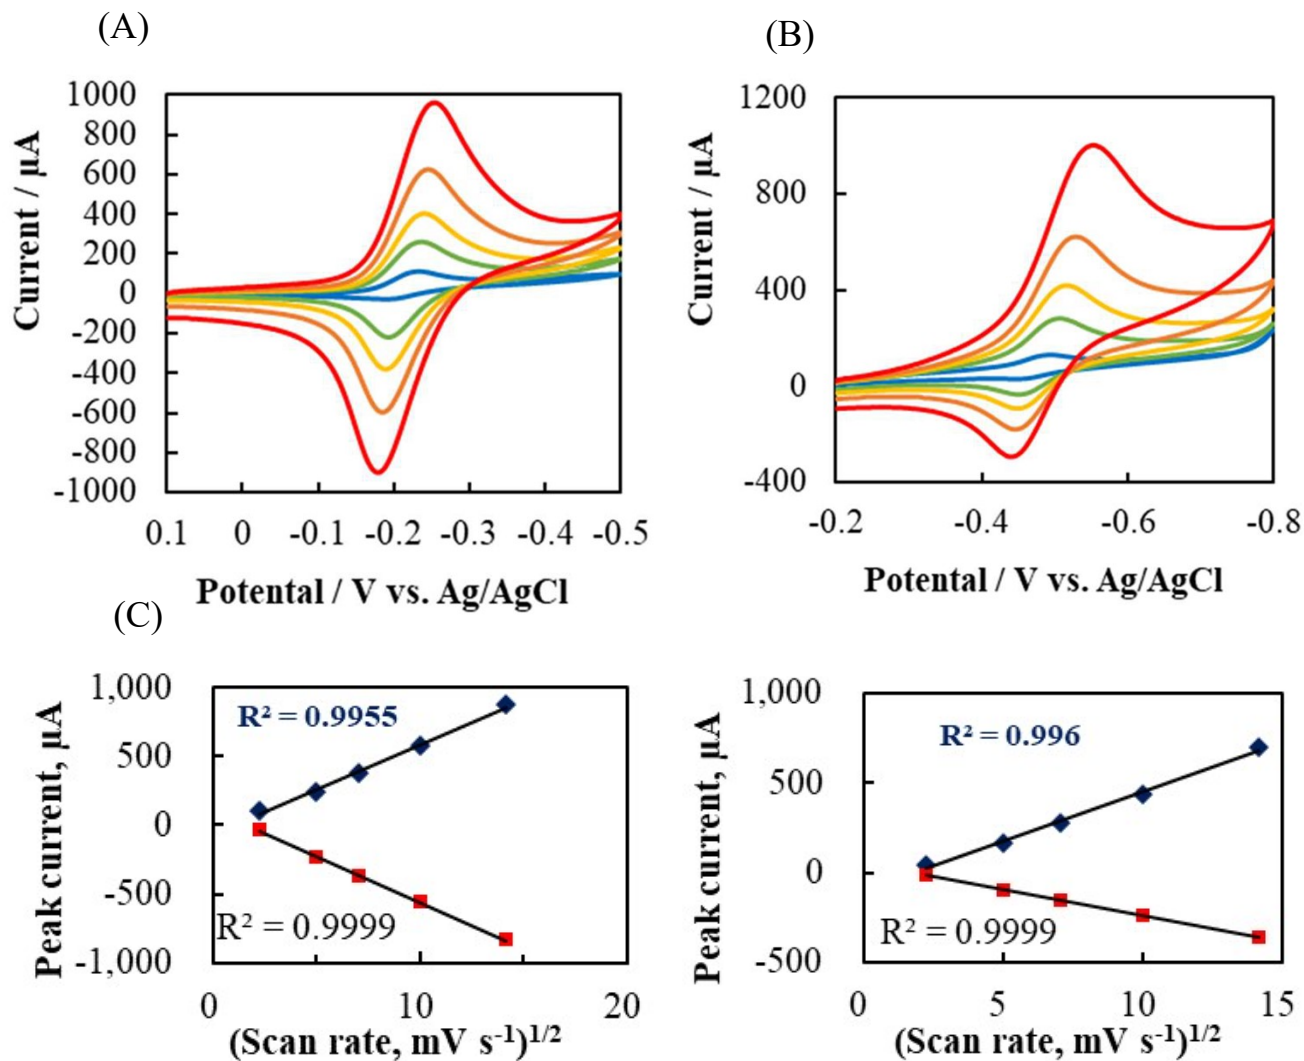

**Figure S2.** Cyclic voltammograms of (A) 100  $\mu\text{M}$  methylene blue and (B) 100  $\mu\text{M}$  phenosafranine using the gold mesh-covered fiber optic sensor at a different scan rate. (C) The plots of the current vs. square root of scan rate for 100  $\mu\text{M}$  methylene blue and 100  $\mu\text{M}$  phenosafranine.

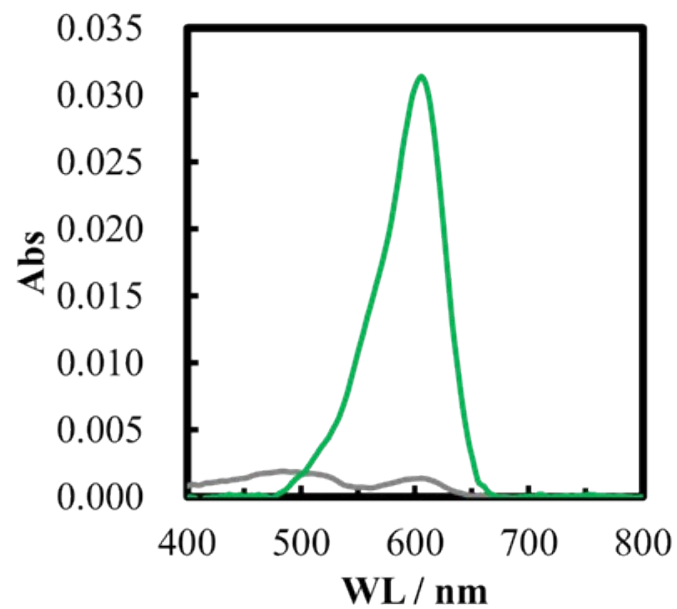

**Figure S3.** Absorption spectra of 50  $\mu\text{M}$  indigo sulfonate in 0.1 M PBS (pH = 7.0) including 0.1 mM CTA<sup>+</sup> (Green line). The measurements were performed using the fiber-optic ATR method. Gray line shows control.

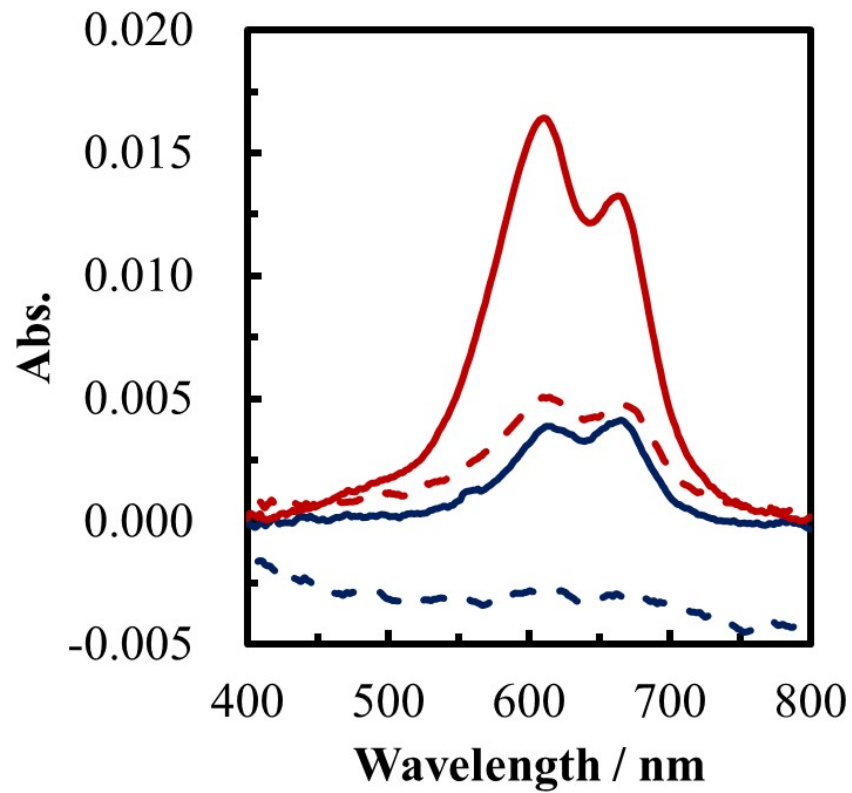

**Figure S4.** Absorption spectra obtained from 25  $\mu\text{M}$  (red line) and 3  $\mu\text{M}$  (blue line) sulfide ion using the electrochemical fiber optic sensor (dotted lines are controls).

**Table S1.** Summary of absorbance enhancement for 24 dyes upon surfactant addition.

| No | Dyes               | Charge | C / $\mu\text{M}$ | (FT200UMT, bare)       |                | 0.41 M SDS add         |       | 0.10 M CTAB add        |       | Ratio A/A <sub>0</sub> |
|----|--------------------|--------|-------------------|------------------------|----------------|------------------------|-------|------------------------|-------|------------------------|
|    |                    |        |                   | $\lambda_{\text{max}}$ | A <sub>0</sub> | $\lambda_{\text{max}}$ | A     | $\lambda_{\text{max}}$ | A     |                        |
| 1  | Thionine Acetate   | 1      | 100               | 610 nm                 | 0.003          | 610 nm                 | 0.004 |                        |       | 1.12                   |
| 2  | New Methylene Blue | 1      | 10                | 570 nm                 | 0.010          | 585 nm                 | 0.011 |                        |       | 1.06                   |
| 3  | Methylene Blue     | 1      | 10                | 605 nm                 | 0.006          | 600 nm                 | 0.034 |                        |       | 5.81                   |
| 4  | Methyl Violet B    | 1      | 10                | 540 nm                 | 0.010          | 550 nm                 | 0.039 |                        |       | 4.00                   |
| 5  | Ethyl Violet       | 1      | 10                | 520 nm                 | 0.097          | 545 nm                 | 0.077 |                        |       | 0.80                   |
| 6  | Rhodamine B        | 1      | 100               | 555 nm                 | 0.018          | 555 nm                 | 0.039 |                        |       | 2.17                   |
| 7  | Rhodamine 6GX      | 1      | 100               | 500 nm                 | 0.018          | 505 nm                 | 0.051 |                        |       | 2.75                   |
| 8  | Fenosafranin       | 1      | 100               | 520 nm                 | 0.006          | 510 nm                 | 0.016 |                        |       | 2.79                   |
| 9  | Methyl Orange      | -1     | 100               | 450 nm                 | 0.001          |                        |       | 380 nm                 | 0.084 | 64.50                  |
| 10 | Ethyl Orange       | -1     | 100               | 435 nm                 | 0.004          |                        |       | 395 nm                 | 0.167 | 38.60                  |
| 11 | Alizarine Violet   | -1     | 100               | 500 nm                 | 0.002          |                        |       | 535 nm                 | 0.016 | 8.16                   |
| 12 | Alizarine Red      | -1     | 100               | 515 nm                 | 0.001          |                        |       | 545 nm                 | 0.007 | 5.92                   |
| 13 | Orange I           | -1     | 100               | 465 nm                 | 0.001          |                        |       | 470 nm                 | 0.042 | 37.23                  |
| 14 | Orange II          | -1     | 100               | 515 nm                 | 0.013          |                        |       | 485 nm                 | 0.033 | 2.51                   |
| 15 | Phenol Red         | -1     | 100               | 435 nm                 | 0.002          |                        |       | 435 nm                 | 0.041 | 21.57                  |
| 16 | Thimol Blue        | -1     | 100               | 455 nm                 | 0.004          |                        |       | 450 nm                 | 0.031 | 8.46                   |
| 17 | DCPIP              | -1     | 100               | 555 nm                 | 0.002          |                        |       | 635 nm                 | 0.049 | 20.29                  |
| 18 | Nucler Fast Red    | 0      | 100               | 520 nm                 | 0.002          |                        |       | 505 nm                 | 0.002 | 1.31                   |
| 19 | Indigo Sulfonate   | -2     | 100               | 605 nm                 | 0.001          |                        |       | 605 nm                 | 0.031 | 22.67                  |
| 20 | Bromocresol Purple | -2     | 100               | 405 nm                 | 0.007          |                        |       | 605 nm                 | 0.071 | 10.45                  |
| 21 | Bromocresol Green  | -2     | 100               | 625 nm                 | 0.015          |                        |       | 625 nm                 | 0.016 | 1.02                   |
| 22 | Bromophenol Blue   | -2     | 100               | 605 nm                 | 0.010          |                        |       | 610 nm                 | 0.050 | 5.07                   |
| 23 | Bromothymol Blue   | -2     | 100               | 425 nm                 | 0.007          |                        |       | 430 nm                 | 0.020 | 2.98                   |
| 24 | Sulfonazo III      | -4     | 100               | 485 nm                 | 0.002          |                        |       | 485 nm                 | 0.019 | 9.21                   |
